# Supplementary material for: Thickness determines microbial community structure and function in nitrifying biofilms via deterministic assembly
Source: PubMed Central journal article supplement (PMC6434030; doi:10.1038/s41598-019-41542-1), 2019-03-25
Supplement: 41598_2019_41542_MOESM1_ESM.pdf [file 41598_2019_41542_MOESM1_ESM.pdf]

1 Supplementary material for:

2 Thickness determines microbial community structure and function in nitrifying biofilms via  
3 deterministic assembly.

4 Carolina Suarez, Maria Piculell, Oskar Modin, Silke Langenheder, Frank Persson, Malte  
5 Hermansson

6

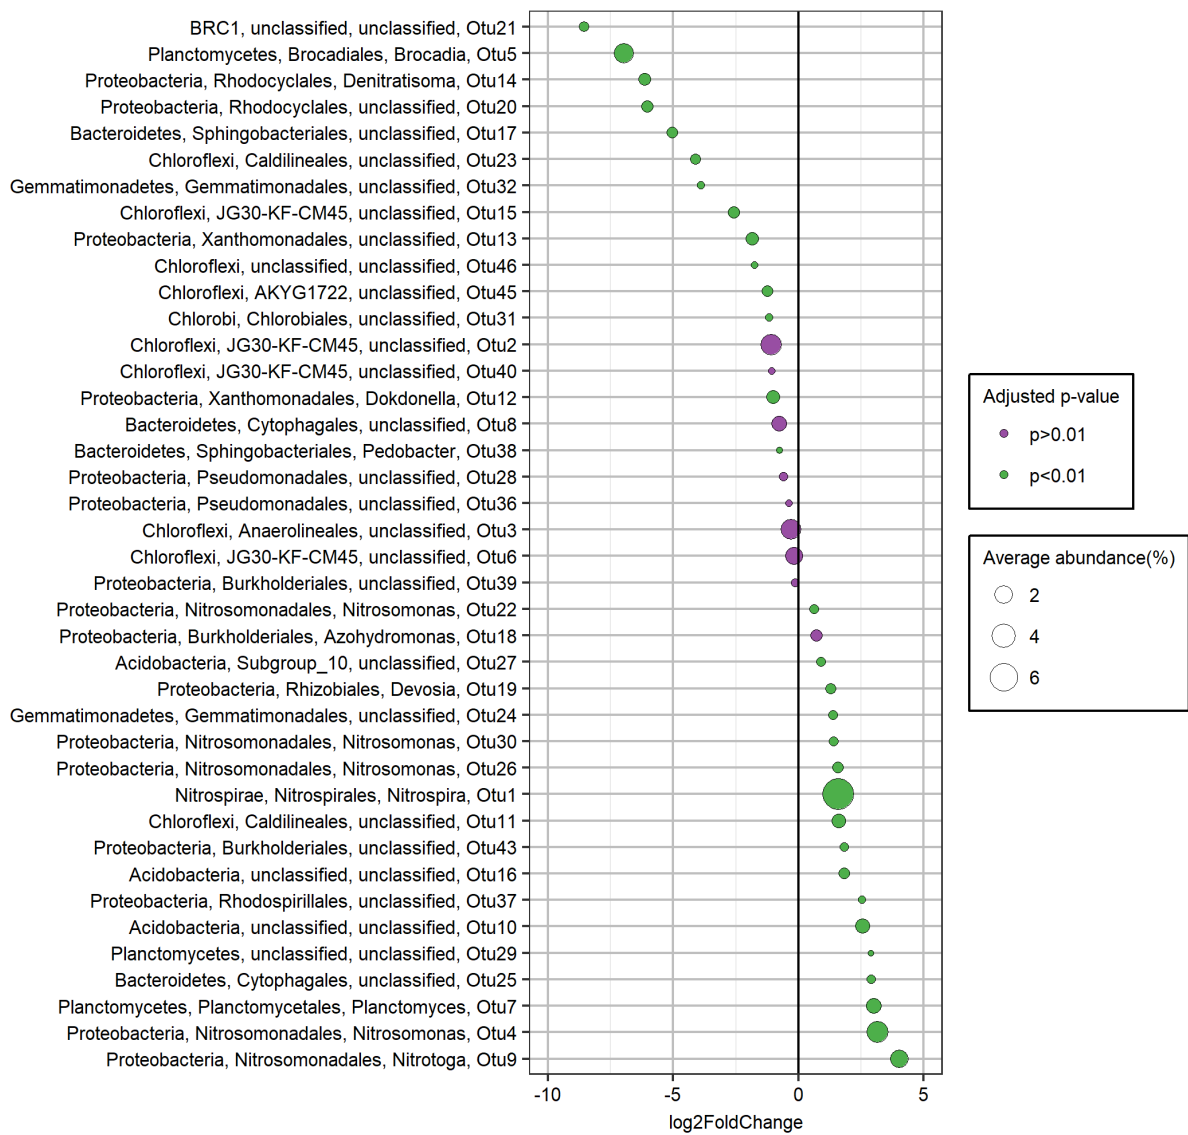

7

8

9 **Fig S1:** Log2fold (DESeq2) changes for the 40 most abundant SVs based on average  
 10 abundance. Phylum, order and genus classification are shown. Each circle represents an SV.  
 11 The size of the circle is proportional to the total sequence read abundance for the SV. A  
 12 negative log2 fold change indicates that SV are more abundant in Z400 biofilm, while a  
 13 positive log2 fold change indicates SVs more abundant in Z50 biofilms.

14

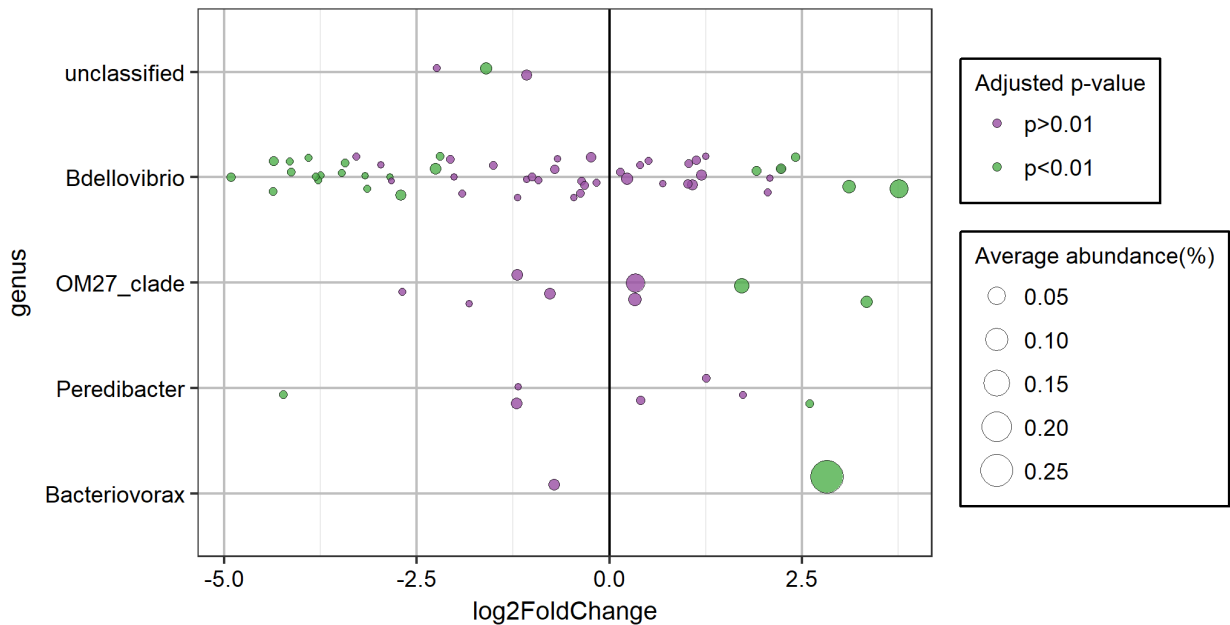

15

16 **FIG S2:** Log2fold (DESeq2) changes for *Bdellovibrionales* SVs. Genus classification is  
 17 shown. Each circle represents an SV. The size of the circle is proportional to the total  
 18 sequence read abundance for the SV. A negative log2 fold change indicates that SV are more  
 19 abundant in Z400 biofilm, while a positive log2 fold change indicates SVs more abundant in  
 20 Z50 biofilms. SVs with a NA  $p_{(adj)}$  value (DESeq2) are not shown.

21

22

23

24

## Supplemental Material and Methods

### 25 **Fluorescence in situ hybridization**

26 Carriers were removed directly from the pilot reactor and fixed in 4% paraformaldehyde for  
27 8h at 4°C. Following fixation the biofilms were rinsed by immersing the carriers twice in  
28 phosphate-buffered saline (PBS) for 15 min, after which the carriers were stored in 50:50  
29 PBS-ethanol at -20°C until analysis.

### 30 **Preparation of qFISH:**

31 Biofilm suspensions were used for qFISH by brushing off the fixed biofilm from three Z50  
32 and three Z400 carriers and homogenizing the biomass in PBS. The biofilm suspensions were  
33 stored in 50:50 PBS-ethanol at -20°C until use. Prior to FISH, 15 µl aliquots were spotted  
34 onto SuperFrost Plus Gold microscope slides (Menzel GmbH, Braunschweig, Germany). A  
35 hydrophobic barrier frame was applied to the glass slides around the regions containing the  
36 biofilm suspensions by using a Liquid Blocker Mini Pap Pen (Thermo Fisher Scientific, USA)

### 37 **Differences between qFISH and sequence abundance**

38 qFISH and Miseq are complementary methods and differences are expected because methods  
39 are based on different principles; sequencing detect rDNA and FISH detect rRNA. For  
40 instance, we noticed that the signal strength of the AMX820 probe was low for many  
41 anammox cells, which can lead to difficulties in distinguish signal from background during  
42 image segmentation. Also differences in ribosomal gene copy number, DNA extraction  
43 methods as well as e-DNA could influence sequencing results <sup>1,2</sup>. Also, underestimation of  
44 *Nitrosomonas* in 16S rRNA PCR methods compare to qFISH has been noticed in several  
45 studies <sup>3,4</sup>, perhaps depending on relatively high ribosomal content even in inactive cells <sup>5</sup>.

46 Hence, all methods suffer from limitations and multiple methods provide important  
47 complementary information.

#### 48 **Preparation of cryosections:**

49 After fixation, a 1 cm<sup>2</sup> section of the carrier, was selected and cut for cryosectioning. To  
50 remove the biofilm from the plastic, the carrier section was placed in a container filled with  
51 Optimal Cutting Temperature (O.C.T.) compound (VWR, USA) and stored overnight at 4°C.  
52 The next day the container was placed in a container with dry ice until the O.C.T. compound  
53 was completely frozen, after which the plastic carrier section could be removed while biofilm  
54 remained attached to the compound. The intact biofilm was covered with more compound  
55 before it was re-frozen and stored at -80°C until use. Biofilm cryosections were obtained  
56 using a HM550 microtome cryostat (MICROM International GmbH, Germany) at -20°C,  
57 cutting out 20–25 µm thick cross-sections of the biofilm which were collected on SuperFrost  
58 Plus Gold microscope slides (Menzel GmbH, Braunschweig, Germany). Finally, the slides  
59 were covered with a low melting agarose layer to avoid biomass detachment during FISH.  
60 FISH was performed at 46°C for 2 h <sup>6</sup>. When probes with different hybridization stringency  
61 optima were applied to the same sample, consecutive hybridizations were performed,  
62 beginning with the probe(s) requiring the most stringent conditions <sup>6</sup>. Competitor probes were  
63 added as unlabeled oligonucleotides in equimolar amounts as the labeled probes to the  
64 hybridization mix, in order to increase hybridization specificity. For qFISH a permeable  
65 nucleic acids stain, SYTO 40 was used as reference (Thermo Fisher Scientific, USA) and  
66 specific population probes (see Supplementary Table S1) were labeled with Cy3 or Cy5.  
67 During FISH on cryosections populations were labelled with FAM, Cy3, Cy5 and one of the  
68 probes was double labeled with Cy3 and Cy5 <sup>7</sup>. Labeled oligonucleotides were synthesized  
69 by Eurofins Genomics (Germany). Counterstaining with SYTO 40 (Thermo Fisher Scientific,

70 USA) was done at 10  $\mu$ M for 30 minutes. After FISH and counterstaining, the slides were  
71 mounted in the antifadant Prolong Diamong Antifade (Thermo Fisher Scientific, USA).

72

73 **Table S1.** FISH probes used in this study

| Probe    | Target                                                    | Formamide | Reference |
|----------|-----------------------------------------------------------|-----------|-----------|
| Cla6192  | <i>Nitrosomonas</i> cluster 6                             | 35%       | 8         |
| NEU      | <i>Nitrosomonas</i><br><i>halophila/eutropha/europaea</i> | 40%       | 9         |
| Ntspa662 | <i>Nitrospira</i>                                         | 35%       | 10        |
| Ntoga122 | <i>Nitrotoga</i>                                          | 40%       | 11        |
| AMX820   | <i>Brocadia</i> and <i>Kuenenia</i>                       | 40%       | 12        |

74

#### 75 **Microscopy and image analysis**

76 Images were acquired using a Zeiss LSM700 confocal microscope (Carl Zeiss, Germany),  
77 using laser lines of 405, 488, 555 and 639 nm at settings of frame mode and averaging = 4.  
78 The same pinhole size was used in all channels, equivalent to 1AU for the Cy5 channel.

79 Images were obtained with a 40 $\times$ /1.3 plan-apochromat oil objective. To create composite  
80 images of large size, the tile function of the Zeiss ZEN2012 software was used. Contrast of  
81 SYTO 40 was lowered in images of cryosections to facilitate visualization of populations;  
82 intensity of the Cy5 channel was increased due to low Cy5 signal for the double labelled  
83 probe. For qFISH pictures were taken from 30 random fields of view for each target  
84 populations in each carrier type.

85 The relative abundances of the target populations for qFISH was estimated on biofilm  
86 suspensions as the ratios of the FISH-targeted biovolumes of the specific populations to the  
87 total FISH-targeted biovolumes (SYTO 40, Table S1) in daime2.1<sup>13</sup>. After importing the  
88 image channels, noise reduction (4 voxels) and median filtering was used (1 voxel). For all  
89 channels, low intensity pixels, below a threshold of 75, were removed. For 2-D segmentation,

90 biomass detection was done by thresholding using the RATS-L algorithm. Boolean operations  
91 were used in the image masks to remove signal not present in the reference channel.

92 Biovolume fraction was calculated using the SYTO-channel as reference.

93 Targets, hybridization conditions and references for the FISH probes are described in table  
94 S1.

### 95 **Biofilm structure staining**

96 The biofilm matrix was stained in cryosections with FilmTracer SYPRO Ruby biofilm matrix  
97 stain (Thermo Fisher Scientific, USA) using 200µl for 30 min. The slides were then mounted  
98 with Prolong Diamond Antifade. For microscopy a laser line of 488nm was used, with  
99 settings of frame mode and averaging = 4. A pinhole size was used equivalent to 1AU.  
100 Images were obtained with a 40×/1.3 plan-apochromat oil objective.

### 101 **DNA extraction and 16s sequencing**

102 Biomass was removed from the Z-carriers by brushing it into 4 ml of sterile water, with the  
103 resulting suspension being transferred to a 15ml centrifuge tube. The suspension was  
104 centrifuged at 4653g for 3 minutes and the supernatant was discarded. 978 µl of sodium  
105 phosphate buffer and 122 µl of MT buffer, of the FastDNA SPIN kit for soil (MP  
106 Biomedicals), were added to the 15 ml centrifuge tubes. The biofilms were resuspended by  
107 pipetting and 1.1 ml of the suspensions were transferred to Lysing Matrix E tubes. FastPrep  
108 homogenization and subsequent purification steps were done according to manufacturer  
109 instructions.

110 PCR amplification of the v4 region of the 16S rRNA gene was done with primers 515F' <sup>14</sup>  
111 and 806R <sup>15</sup>, using dual indexing of the primers <sup>16</sup>. 40 ng of template were amplified using a  
112 Phusion Hot Start II DNA Polymerase (Thermo Fisher Scientific, USA). The following PCR  
113 program was used: activation (98°C, 30 s); 30 cycles of denaturation (98°C, 10 s), annealing

114 (56°C, 30 s) and elongation (72°C, 15 s); followed by final elongation (72°C, 10 min). PCR  
115 products were purified with the MagJET NGS Cleanup and Size Selection Kit (Thermo Fisher  
116 Scientific, USA). DNA concentrations of the purified products were measured using a Qubit  
117 3.0 fluorometer (Thermo Fisher Scientific, USA), using the dsDNA HS assay kit (Thermo  
118 Fisher Scientific, USA). The obtained products were quality checked by standard gel  
119 electrophoresis. Purified PCR products were pooled in equimolar amounts. Quality control of  
120 the pooled PCR product was performed on a TapeStation 2200 (Agilent Technologies). PhiX  
121 control library was spiked in at 7.5%. Sequencing was performed on an Illumina MiSeq using  
122 the MiSeq Reagent Kit v2.

123 Raw sequence reads were processed in Usearch (version 10). Paired-end reads were merged  
124 with the fastq\_mergepairs command allowing a maximum of 12 mismatches in the alignment.  
125 This resulted in 2 113 324 merged reads. The merged reads were quality filtered using a  
126 maximum expected error cutoff of 0.5 and a minimum sequence length of 200 bp. The quality  
127 filtered reads were used as input to the Unoise algorithm<sup>17</sup> to generate sequence variants. A  
128 minimum abundance threshold of 4 was specified in the unoise3 command. This means that  
129 sequence variants were discarded if they were represented by fewer than 4 quality filtered  
130 reads across all samples. In total, 1 657 741 reads were mapped to 3692 sequence variants.  
131 Taxonomic classification was done with the syntax algorithm<sup>18</sup> and the SILVA 128 training  
132 set database was used for taxonomic classification<sup>19</sup>.

133

134 **MATHEMATICAL MODELING**

135 **Detailed model description**

136 The goal of the mathematical model was to simulate dissolved oxygen (DO) concentration  
 137 profiles and ammonium oxidation rates in biofilms on the Z400 and Z50 carriers. The notation  
 138 used in the model is shown in Supplementary Table S2.

139

140 **Table S2.** Notation used in the DO model.

| Parameter                                      | Definition                                                                          | Units                                                 |
|------------------------------------------------|-------------------------------------------------------------------------------------|-------------------------------------------------------|
| <i>Biomass and substrate components</i>        |                                                                                     |                                                       |
| $X_H$                                          | Concentration of heterotrophic bacteria                                             | $\text{gCOD m}^{-3}$                                  |
| $X_A$                                          | Concentration of ammonium-oxidizing bacteria (AOB)                                  | $\text{gCOD m}^{-3}$                                  |
| $X_N$                                          | Concentration of nitrite-oxidizing bacteria (NOB)                                   | $\text{gCOD m}^{-3}$                                  |
| $X_I$                                          | Concentration of inert solids                                                       | $\text{gTS m}^{-3}$                                   |
| $S_O$                                          | Concentration of dissolved oxygen                                                   | $\text{gO}_2 \text{ m}^{-3}$                          |
| $S_N$                                          | Concentration of nitrite                                                            | $\text{gN m}^{-3}$                                    |
| $S_A$                                          | Concentration of ammonium                                                           | $\text{gN m}^{-3}$                                    |
| $S_C$                                          | Concentration of soluble, readily biodegradable organics                            | $\text{gCOD m}^{-3}$                                  |
| <i>Kinetic and stoichiometric coefficients</i> |                                                                                     |                                                       |
| $\mu_{H\max}$                                  | Maximum growth rate of heterotrophs                                                 | $\text{d}^{-1}$                                       |
| $b_H$                                          | Aerobic endogenous respiration rate constant for heterotrophs                       | $\text{d}^{-1}$                                       |
| $K_{OH}$                                       | Affinity constant for oxygen of heterotrophs                                        | $\text{gO}_2 \text{ m}^{-3}$                          |
| $K_C$                                          | Affinity constant for organics of heterotrophs                                      | $\text{gCOD m}^{-3}$                                  |
| $Y_H$                                          | Yield coefficient for heterotrophs growing aerobically                              | $\text{gCOD}_{XH} \text{ g}^{-1}\text{COD}_{SC}$      |
| $\mu_{A\max}$                                  | Maximum growth rate of AOB                                                          | $\text{d}^{-1}$                                       |
| $b_A$                                          | Aerobic endogenous respiration rate constant for AOB                                | $\text{d}^{-1}$                                       |
| $K_{OA}$                                       | Affinity constant for oxygen of AOB                                                 | $\text{gO}_2 \text{ m}^{-3}$                          |
| $K_A$                                          | Affinity constant for ammonium of AOB                                               | $\text{gN m}^{-3}$                                    |
| $Y_A$                                          | Yield coefficient for AOB                                                           | $\text{gCOD}_{XA} \text{ g}^{-1}\text{NH}_4\text{-N}$ |
| $\mu_{N\max}$                                  | Maximum growth rate of NOB                                                          | $\text{d}^{-1}$                                       |
| $b_N$                                          | Aerobic endogenous respiration rate constant for NOB                                | $\text{d}^{-1}$                                       |
| $K_{ON}$                                       | Affinity constant for oxygen of NOB                                                 | $\text{gO}_2 \text{ m}^{-3}$                          |
| $K_N$                                          | Affinity constant for $\text{NO}_2^-$ of NOB                                        | $\text{gN m}^{-3}$                                    |
| $Y_N$                                          | Yield coefficient for NOB                                                           | $\text{gCOD}_{XN} \text{ g}^{-1}\text{NO}_2\text{-N}$ |
| $f_{XI}$                                       | Fraction live biomass being convert to inert material during endogenous respiration |                                                       |
| $i_{NX}$                                       | Nitrogen content in biomass                                                         | $\text{gNH}_4\text{-N g}^{-1}\text{COD}$              |



| <i>Physical parameters</i> |                                                                        |               |
|----------------------------|------------------------------------------------------------------------|---------------|
| $D_{W\_O}$                 | Diffusion coefficient of oxygen in water                               | $m^2 s^{-1}$  |
| $D_{W\_N}$                 | Diffusion coefficient of nitrite in water                              | $m^2 s^{-1}$  |
| $D_{W\_A}$                 | Diffusion coefficient of ammonium in water                             | $m^2 s^{-1}$  |
| $D_{W\_C}$                 | Diffusion coefficient of organic carbon in water                       | $m^2 s^{-1}$  |
| $D_e$                      | Effective diffusion coefficient, i.e. diffusion coefficient in biofilm | $m^2 s^{-1}$  |
| $f_{VS}$                   | Fraction of the total solids that is live, active bacteria             |               |
| $fX_H$                     | Fraction of the live bacteria that is aerobic heterotrophs             |               |
| $fX_A$                     | Fraction of the live bacteria that is AOB                              |               |
| $fX_N$                     | Fraction of the live bacteria that is NOB                              |               |
|                            |                                                                        |               |
| $S_{O,bulk}$               | Concentration dissolved oxygen in bulk liquid                          | $gO_2 m^{-3}$ |
| $S_{N,bulk}$               | Concentration nitrite in bulk liquid                                   | $gN m^{-3}$   |
| $S_{A,bulk}$               | Concentration ammonium in bulk liquid                                  | $gN m^{-3}$   |
| $S_{C,bulk}$               | Concentration organic carbon in bulk liquid                            | $gCOD m^{-3}$ |
|                            |                                                                        |               |
| $L$                        | Biofilm thickness                                                      | $m$           |
| $\Delta x$                 | Thickness of layer in biofilm                                          | $m$           |
| $X_{TS}$                   | Biofilm density                                                        | $gTS m^{-3}$  |
| $\delta_{BL}$              | Bulk liquid-biofilm diffusion boundary layer thickness                 | $M$           |

141

## 142 **Components**

143 The model included three biomass components: aerobic heterotrophs ( $X_H$ ), AOB ( $X_A$ ), and  
 144 NOB ( $X_N$ ). It calculated the diffusion and conversions of four soluble components: DO ( $S_O$ ),  
 145 nitrite ( $S_N$ ), ammonium ( $S_A$ ), and biodegradable organic carbon ( $S_C$ ).

## 146 **Biochemical conversions**

147 The activities of the three microbial groups ( $X_H$ ,  $X_A$ , and  $X_N$ ) were described using Monod  
 148 kinetics. In total six kinetic equations described the rates of growth and decay (Supplementary  
 149 Table S3). Aerobic oxidations of  $S_C$ ,  $S_A$ , and  $S_N$  were considered. Denitrification and  
 150 anammox were not included in the model because those processes were assumed to have only  
 151 minor effect on the DO concentration profiles. A stoichiometric matrix (Supplementary Table  
 152 S4) linked the kinetic equations to conversion rates of the soluble components. The  
 153 conversion rate for a component of interest can be calculated using Equation 1. The kinetic

154 and stoichiometric coefficient values used as default input to the model are shown in Table  
 155 S5.

$$156 \quad r_i = \sum_{j=1}^{j=9} x_{ij} \cdot p_j \quad (1)$$

157 where  $r_i$  is the conversion rate of component  $i$ ,  $x_{ij}$  is the stoichiometric coefficient for  
 158 component  $i$  and process  $j$ , and  $p_j$  is the rate of process  $j$ .

159

160

161 **Table S3.** Kinetic rate expressions used in the DO model.

| #                   | Process                                        | Equation                                                                          |
|---------------------|------------------------------------------------|-----------------------------------------------------------------------------------|
| <b>Heterotrophs</b> |                                                |                                                                                   |
| 0                   | Aerobic growth                                 | $\mu_{Hmax} \cdot \frac{S_O}{K_{OH} + S_O} \cdot \frac{S_C}{K_C + S_C} \cdot X_H$ |
| 1                   | Aerobic endogenous respiration                 | $b_H \cdot \frac{S_O}{K_{OH} + S_O} \cdot X_H$                                    |
| <b>AOB</b>          |                                                |                                                                                   |
| 2                   | Aerobic growth                                 | $\mu_{Amax} \cdot \frac{S_O}{K_{OA} + S_O} \cdot \frac{S_A}{K_A + S_A} \cdot X_A$ |
| 3                   | Aerobic endogenous respiration                 | $b_A \cdot \frac{S_O}{K_{OA} + S_O} \cdot X_A$                                    |
| <b>NOB</b>          |                                                |                                                                                   |
| 4                   | Aerobic growth on NO <sub>2</sub> <sup>-</sup> | $\mu_{Nmax} \cdot \frac{S_O}{K_{ON} + S_O} \cdot \frac{S_N}{K_N + S_N} \cdot X_N$ |
| 5                   | Aerobic endogenous respiration                 | $b_N \cdot \frac{S_O}{K_{ON} + S_O} \cdot X_N$                                    |

162

163 **Table S4.** Stoichiometric matrix used in the DO model

| Comp. (i)   | S0                                                | S1                                     | S2                                    | S3                                     |                                                    |
|-------------|---------------------------------------------------|----------------------------------------|---------------------------------------|----------------------------------------|----------------------------------------------------|
| Process (j) | S <sub>O</sub> (gO <sub>2</sub> m <sup>-3</sup> ) | S <sub>NO2</sub> (gN m <sup>-3</sup> ) | S <sub>NH</sub> (gN m <sup>-3</sup> ) | S <sub>C</sub> (gCOD m <sup>-3</sup> ) | Units of rates                                     |
| <b>P0</b>   | 1-1/Y <sub>H</sub>                                |                                        | -i <sub>NX</sub>                      | -1/Y <sub>H</sub>                      | gCOD <sub>XH</sub> m <sup>-3</sup> d <sup>-1</sup> |
| <b>P1</b>   | f <sub>XI</sub> -1                                |                                        | i <sub>NX</sub> *(1-f <sub>XI</sub> ) |                                        | gCOD <sub>XH</sub> m <sup>-3</sup> d <sup>-1</sup> |
| <b>P2</b>   | 3.43*(i <sub>NX</sub> -1/Y <sub>A</sub> )         | -i <sub>NX</sub> +1/Y <sub>A</sub>     | -1/Y <sub>A</sub>                     |                                        | gCOD <sub>XA</sub> m <sup>-3</sup> d <sup>-1</sup> |
| <b>P3</b>   | f <sub>XI</sub> -1                                |                                        | i <sub>NX</sub> *(1-f <sub>XI</sub> ) |                                        | gCOD <sub>XA</sub> m <sup>-3</sup> d <sup>-1</sup> |

|           |             |          |                     |  |                           |
|-----------|-------------|----------|---------------------|--|---------------------------|
| <b>P4</b> | $-1.14/Y_N$ | $-1/Y_N$ | $-i_{NX}$           |  | $gCOD_{XN} m^{-3} d^{-1}$ |
| <b>P5</b> | $f_{XI}-1$  |          | $i_{NX}*(1-f_{XI})$ |  | $gCOD_{XN} m^{-3} d^{-1}$ |

164

165 **Table S5.** Kinetic and stoichiometric coefficients used in the DO model.

| <b>Coefficient</b>  | <b>Value</b>                         | <b>Reference</b> |
|---------------------|--------------------------------------|------------------|
| <b>Heterotrophs</b> |                                      |                  |
| $\mu_{Hmax}$        | $4 d^{-1}$                           | 20               |
| $b_H$               | $0.2 d^{-1}$                         | 21               |
| $K_{OH}$            | $0.2 gO_2 m^{-3}$                    | 21               |
| $K_C$               | $5 gCOD_{SC} m^{-3}$                 | 20               |
| $Y_H$               | $0.67 gCOD_{XH} g^{-1}COD_{SC}$      | 20               |
|                     |                                      |                  |
| <b>AOB</b>          |                                      |                  |
| $\mu_{Amax}$        | $1.4 d^{-1}$                         | 22               |
| $b_A$               | $0.3 d^{-1}$                         | 22               |
| $K_{OA}$            | $0.3 gO_2 m^{-3}$                    | 23               |
| $K_A$               | $2.4 gN m^{-3}$                      | 23               |
| $Y_A$               | $0.15 gCOD_{XA} g^{-1}N$             | 23               |
|                     |                                      |                  |
| <b>NOB</b>          |                                      |                  |
| $\mu_{Nmax}$        | $1.1 d^{-1}$                         | 23               |
| $b_N$               | $0.2 d^{-1}$                         | 22               |
| $K_{ON}$            | $0.1 gO_2 m^{-3}$                    | 23               |
| $K_N$               | $0.238 gN m^{-3}$                    | 23               |
| $Y_N$               | $0.041 gCOD_{XN} g^{-1}N$            | 23               |
|                     |                                      |                  |
| <b>Other</b>        |                                      |                  |
| $f_{XI}$            | $0.2 gCOD_{XI} g^{-1}COD_{XH,XA,XN}$ | 24               |
| $i_{NX}$            | $0.07 gN g^{-1}COD_{XH,XA,XN}$       | 24               |

166

167 **Biofilm model**

168 The biofilm was divided into 1  $\mu m$  thick layers. Each layer was assumed to have uniform

169 distribution of biomass- and soluble components. The biomass was distributed into the

170 biofilm layers based on measured total solids concentrations <sup>25</sup>, qFISH and cryosection FISH

171 images.

172 The concentrations of soluble components in each layer is governed by diffusion (Fick's law)  
 173 and biochemical reactions. The reaction-diffusion mass balance equation for a layer in the  
 174 biofilm can be written as Equation 2.

$$175 \frac{dS_m}{dt} = D_e \cdot \frac{(S_{m+1} - 2 \cdot S_m + S_{m-1}))}{\Delta x^2} + r \quad (2)$$

176 where  $S_m$  is the substrate component concentration in layer  $m$  ( $\text{g m}^{-3}$ ),  $t$  is time (d),  $D_e$  is the  
 177 effective diffusion coefficient of the substrate inside the biofilm ( $\text{m}^2 \text{s}^{-1}$ ),  $\Delta x$  is the thickness of  
 178 a layer (m), and  $r$  is the conversion rate of  $S$  due to biochemical reactions ( $\text{g m}^{-3} \text{s}^{-1}$ ).

179 The effective diffusion coefficient ( $D_e$ ) was calculated based on the correlation with biofilm  
 180 density observed by Fan, et al. <sup>26</sup>

$$181 \frac{D_e}{D_w} = 1 - \frac{0.43 \cdot X_V^{0.92}}{11.19 + 0.27 \cdot X_V^{0.99}} \quad (3)$$

182 where  $D_w$  is the diffusion coefficient in water ( $\text{m}^2 \text{s}^{-1}$ ) and  $X_V$  is the biofilm density ( $\text{kg TS m}^{-3}$ ).  
 183

184 The reaction-diffusion mass balance was solved using a finite difference method with the  
 185 following boundary conditions. At the bottom of the biofilm the diffusion gradient is zero  
 186 (Equation 4) and at the surface the diffusion gradient is governed by mass transfer from the  
 187 bulk liquid (Equation 5).

$$188 \frac{dS_0}{dx} = 0 \quad (4)$$

$$189 \frac{dS_L}{dx} = \frac{D_w}{\delta_{BL}} \cdot (S_B - S_L) \quad (5)$$

190 where  $S_0$  is the concentration at the bottom of the biofilm ( $\text{g m}^{-3}$ ),  $S_L$  is the concentration at the  
 191 outer surface of the biofilm ( $\text{g m}^{-3}$ ),  $\delta_{BL}$  is the liquid-granule boundary layer thickness (m),  
 192 and  $S_B$  is the concentration in the bulk liquid ( $\text{g m}^{-3}$ ).

193 Physical parameter values used as default input to the model are shown in Table S6.

194

195 **Table S6.** Default input values for physical parameters used in the DO model.

| Coefficient         | Value                                           | Reference                                        |
|---------------------|-------------------------------------------------|--------------------------------------------------|
| $D_{W\_O}$          | $3.01 \cdot 10^{-9} \text{ m}^2 \text{ s}^{-1}$ | 27                                               |
| $D_{W\_N}$          | $1.62 \cdot 10^{-9} \text{ m}^2 \text{ s}^{-1}$ | 27                                               |
| $D_{W\_A}$          | $1.74 \cdot 10^{-9} \text{ m}^2 \text{ s}^{-1}$ | 27                                               |
| $D_{W\_C}$          | $1.24 \cdot 10^{-9} \text{ m}^2 \text{ s}^{-1}$ | 28                                               |
| $f_{VS}$            | 0.2-0.8                                         | Different scenarios tested                       |
| $fX_H$              | 76.8% and 54.8%                                 | Calculated ( $1-fX_A-fX_N-fX_{\text{anammox}}$ ) |
| $fX_A$              | 7.4% and 22.6%                                  | For Z400 and Z50                                 |
| $fX_N$              | 12.9% and 22.6%                                 | For Z400 and Z50                                 |
| $S_{O,\text{bulk}}$ | 5.5 and 5.6 $\text{g m}^{-3}$                   | For Z400 and Z50 in batch tests                  |
| $S_{N,\text{bulk}}$ | 0.5 and 0.8 $\text{g m}^{-3}$                   | For Z400 and Z50 in batch tests                  |
| $S_{A,\text{bulk}}$ | 30.7 and 31.3 $\text{g m}^{-3}$                 | For Z400 and Z50 in batch tests                  |
| $S_{C,\text{bulk}}$ | 10 $\text{g m}^{-3}$                            | Assumed                                          |
| $L$                 | 379 and 45 $\mu\text{m}$                        | For Z400 and Z50 (based on FISH)                 |
| $\delta_{BL}$       | $(1.6-16.3) \cdot 10^{-6} \text{ m}$            | Fitted values                                    |

196

197 **Z50 carriers**198 The Z50 carriers had a biofilm density of  $3.3 \text{ gTS/m}^2$  and an average thickness of  $45 \mu\text{m}$ <sup>25</sup>.

199 Cryosection FISH images of the Z50 carriers showed a stratification of the biofilm density,

200 which was used as input to the model (Supplementary Fig. S3a). However, there was no clear

201 stratification of the distribution of  $X_H$ ,  $X_A$  and  $X_N$ . We therefore assumed that these202 components were distributed homogenously throughout the biofilm. The fractions  $X_A$  and  $X_N$ 

203 of the active biomass were both determined to be 22.6% by qFISH; 54.8% was assumed to be

204  $X_H$ .205 **Z400 carriers**206 The Z400 carriers had a biofilm density of  $14.1 \text{ gTS/m}^2$  and an average thickness of  $379 \mu\text{m}$ 207 <sup>25</sup>. The fractions of  $X_A$ ,  $X_N$ , and anammox of the active biomass were 7.4, 12.9, and 2.9% as

208 determined by qFISH. The remaining part of the active biomass, i.e. 76.8%, was assumed to

209 be  $X_H$ . The biomass components were distributed in the biofilm based on stratification data  
210 obtained using cryosection FISH images of the biofilm (Supplementary Fig S3b and S3c).

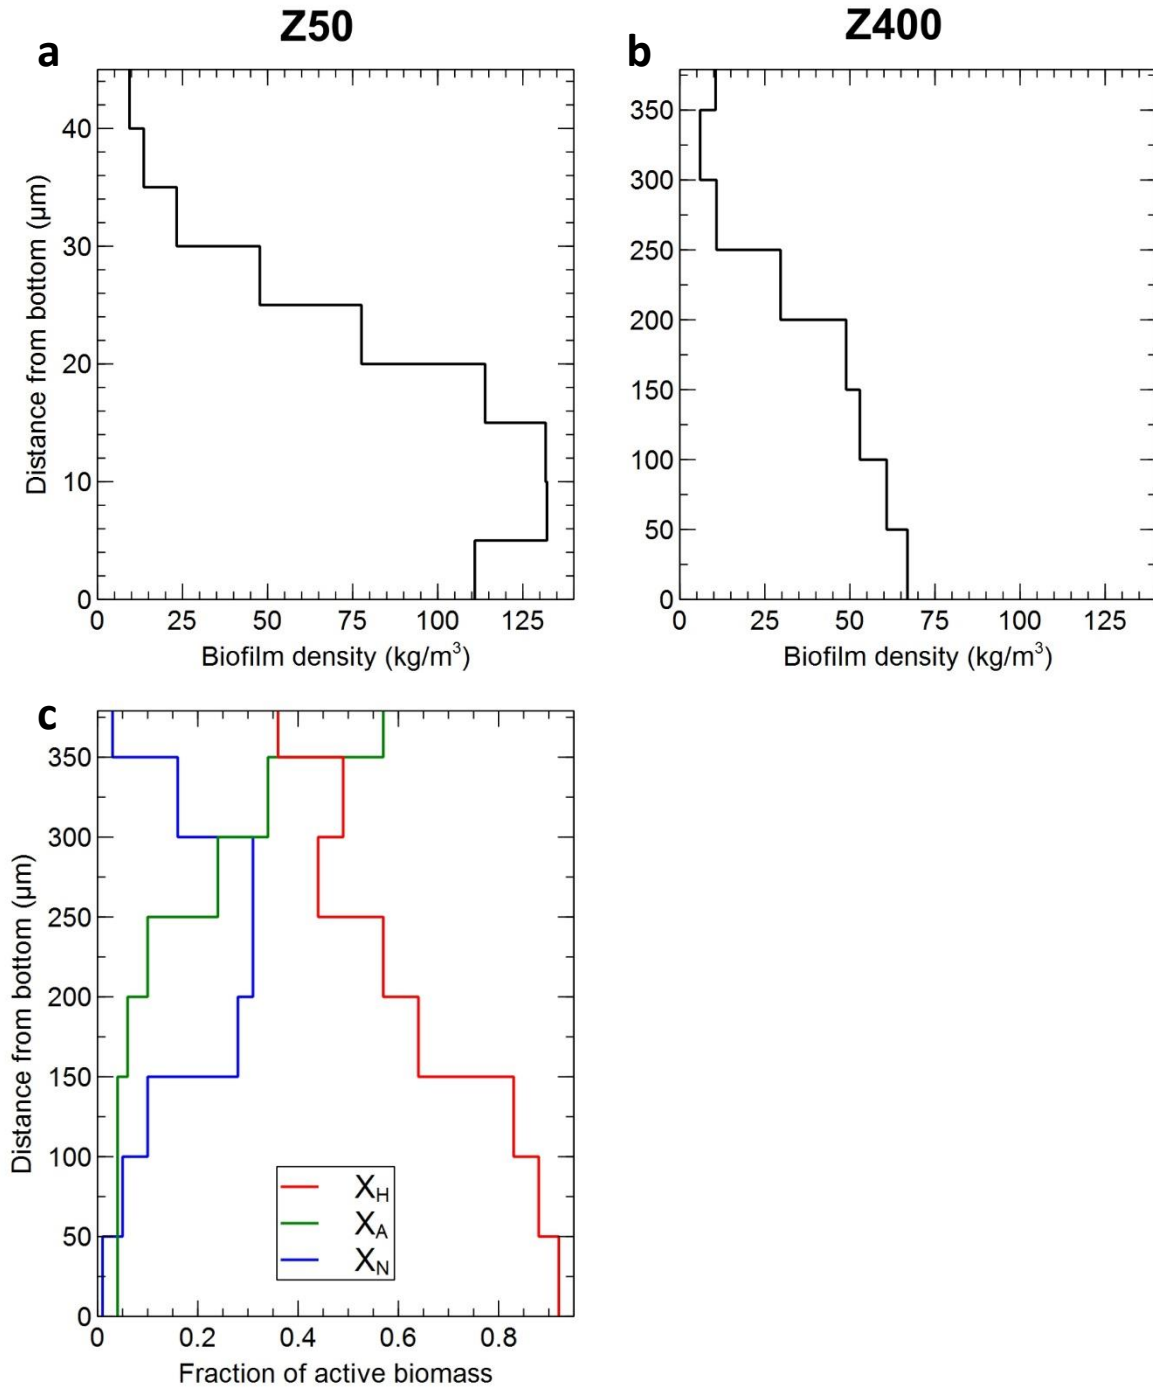

211

212 **Fig. S3.** Density profiles and biomass distribution for the DO model. Biofilm density profiles  
213 (total dry solids) in the Z50 (a) and Z400 (b) biofilms respectively. (c) Assumed biomass  
214 distribution in the Z400 biofilm based on input from qFISH and cryosection FISH images

215

## 216 **Solving the model**

217 The model was programmed and solved in Python 3.3 with the package Numpy 1.9 installed.

218 Two important input parameter values were unknown. The fraction of the total dry solids that

219 was live, active biomass ( $f_{VS}$ ) and the thickness of the diffusion boundary layer between the

220 bulk liquid and the biofilm ( $\delta_{BL}$ ). Using data from the nitrogen transformation activity tests as

221 input, the model was solved for  $f_{VS}$  values ranging from 0.2 to 0.8. For each  $f_{VS}$ , the  $\delta_{BL}$  that

222 resulted in a simulated ammonium consumption rate that equaled the experimentally

223 measured value was determined. For the Z50 biofilms, the  $\delta_{BL}$  ranged from 1.6  $\mu\text{m}$  to 6.8  $\mu\text{m}$

224 for  $f_{VS}$  of 0.2 and 0.8, respectively. For the Z400 biofilms, the  $\delta_{BL}$  ranged from 8.9  $\mu\text{m}$  to 16.3

225  $\mu\text{m}$  for  $f_{VS}$  of 0.2 and 0.8, respectively. The DO concentration profiles that resulted from each

226 set of  $f_{VS}$  and  $\delta_{BL}$  values are shown as shaded region in Figure 6 in the main article. These

227 concentration profiles shows the depth to which DO can penetrate in the biofilms. The width

228 of the shaded regions shows the uncertainty of the model estimations. The model was solved

229 for the conditions in the nitrogen transformation activity batch tests because detailed

230 information about ammonium oxidation rates for the two types of carriers was available from

231 those experiments. The conditions were very similar in the pilot-scale reactor; however, the

232 average DO concentration was slightly lower (5 mg/L in pilot, 5.5-5.6 mg/L in batch tests).

233 This means that the DO penetration into the biofilms may have been somewhat lower in the

234 pilot-scale reactor.

235

## 236 **REFERENCES**

- 237 1 Albertsen, M., Karst, S. M., Ziegler, A. S., Kirkegaard, R. H. & Nielsen, P. H. Back to Basics –  
238 The Influence of DNA Extraction and Primer Choice on Phylogenetic Analysis of  
239 Activated Sludge Communities. *PLoS ONE*. **10**, e0132783 (2015).

240 2 Větrovský, T. & Baldrian, P. The Variability of the 16S rRNA Gene in Bacterial Genomes  
241 and Its Consequences for Bacterial Community Analyses. *PLoS ONE*. **8**, e57923 (2013).

242 3 Baptista, J. D. C. *et al.* Agreement between amoA Gene-Specific Quantitative PCR and  
243 Fluorescence In Situ Hybridization in the Measurement of Ammonia-Oxidizing Bacteria  
244 in Activated Sludge. *Appl. Environ. Microbiol.* **80**, 5901-5910 (2014).

245 4 Persson, F., Suarez, M., Hermansson, M., Plaza, E. & Wilén, B.-M. Community structure of  
246 partial nitrification-anammox biofilms at decreasing substrate concentrations and low  
247 temperature *Microb Biotechnol.* **154**, 267-273 (2016).

248 5 Morgenroth, E. *et al.* Effect of long-term idle periods on the performance of sequencing  
249 batch reactors. *Water Sci. Technol.* **41**, 105 (2000).

250 6 Manz, W., Amann, R., Ludwig, W., Wagner, M. & Schleifer, K.-H. Phylogenetic  
251 Oligodeoxynucleotide Probes for the Major Subclasses of Proteobacteria: Problems and  
252 Solutions. *Syst. Appl. Microbiol.* **15**, 593-600 (1992).

253 7 Behnam, F., Vilcinskis, A., Wagner, M. & Stoecker, K. A Straightforward DOPE (Double  
254 Labeling of Oligonucleotide Probes)-FISH (Fluorescence In Situ Hybridization) Method  
255 for Simultaneous Multicolor Detection of Six Microbial Populations. *Appl. Environ.*  
256 *Microbiol.* **78**, 5138-5142 (2012).

257 8 Adamczyk, J. *et al.* The Isotope Array, a New Tool That Employs Substrate-Mediated  
258 Labeling of rRNA for Determination of Microbial Community Structure and Function.  
259 *Appl. Environ. Microbiol.* **69**, 6875-6887 (2003).

260 9 Wagner, M., Rath, G., Amann, R., Koops, H.-P. & Schleifer, K.-H. In situ Identification of  
261 Ammonia-oxidizing Bacteria. *Syst. Appl. Microbiol.* **18**, 251-264 (1995).

262 10 Daims, H., Nielsen, J. L., Nielsen, P. H., Schleifer, K.-H. & Wagner, M. In Situ  
263 Characterization of Nitrospira-Like Nitrite-Oxidizing Bacteria Active in Wastewater  
264 Treatment Plants. *Appl. Environ. Microbiol.* **67**, 5273-5284 (2001).

265 11 Lückner, S. *et al.* Nitrotoga-like bacteria are previously unrecognized key nitrite oxidizers  
266 in full-scale wastewater treatment plants. *ISME J.* **9**, 708 (2014).

267 12 Schmid, M., Schmitz-Esser, S., Jetten, M. & Wagner, M. 16S-23S rDNA intergenic spacer  
268 and 23S rDNA of anaerobic ammonium-oxidizing bacteria: implications for phylogeny  
269 and in situ detection. *Environ Microbiol.* **3**, 450-459 (2001).

270 13 Daims, H., Lückner, S. & Wagner, M. daime, a novel image analysis program for microbial  
271 ecology and biofilm research. *Environ Microbiol.* **8**, 200-213 (2006).

272 14 Hugerth, L. W. *et al.* DegePrime, a Program for Degenerate Primer Design for Broad-  
273 Taxonomic-Range PCR in Microbial Ecology Studies. *Appl. Environ. Microbiol.* **80**, 5116-  
274 5123 (2014).

275 15 Caporaso, J. G. *et al.* Global patterns of 16S rRNA diversity at a depth of millions of  
276 sequences per sample. *Proc Natl Acad Sci USA.* **108**, 4516-4522 (2011).

277 16 Kozich, J. J., Westcott, S. L., Baxter, N. T., Highlander, S. K. & Schloss, P. D. Development of  
278 a Dual-Index Sequencing Strategy and Curation Pipeline for Analyzing Amplicon  
279 Sequence Data on the MiSeq Illumina Sequencing Platform. *Appl. Environ. Microbiol.* **79**,  
280 5112-5120 (2013).

281 17 Edgar, R. C. UNOISE2: improved error-correction for Illumina 16S and ITS amplicon  
282 sequencing. Preprint at <https://www.biorxiv.org/content/early/2016/10/15/081257>  
283 (2016).

284 18 Edgar, R. SINTAX: a simple non-Bayesian taxonomy classifier for 16S and ITS sequences.  
285 Preprint at <https://www.biorxiv.org/content/early/2016/09/09/074161> (2016).

286 19 Quast, C. *et al.* The SILVA ribosomal RNA gene database project: improved data  
287 processing and web-based tools. *Nucleic Acids Res.* **41**, D590-D596 (2013).

288 20 Gujer, W. & Henze, M. Activated Sludge Modelling and Simulation. *Water Sci. Technol.* **23**,  
289 1011-1023 (1991).

290 21 Gujer, W., Henze, M., Mino, T. & Loosdrecht, M. v. Activated sludge model No. 3. *Water Sci.*  
291 *Technol.* **39**, 183-193 (1999).



292 22 Moussa, M. S., Hooijmans, C. M., Lubberding, H. J., Gijzen, H. J. & van Loosdrecht, M. C. M.  
293 Modelling nitrification, heterotrophic growth and predation in activated sludge. *Water*  
294 *Res.* **39**, 5080-5098 (2005).

295 23 de Kreuk, M. K., Picioreanu, C., Hosseini, M., Xavier, J. B. & van Loosdrecht, M. C. M. Kinetic  
296 model of a granular sludge SBR: Influences on nutrient removal. *Biotechnol. Bioeng.* **97**,  
297 801-815 (2007).

298 24 Henze, M., Gujer, W., Mino, T. & van Loosdrecht, M. *Activated Sludge Models ASM1, ASM2,*  
299 *ASM2D, ASM3*. Vol. 5 (IWA publishing, 2000).

300 25 Piculell, M. *et al.* The inhibitory effects of reject water on nitrifying populations grown at  
301 different biofilm thickness. *Water Res.* **104**, 292-302 (2016).

302 26 Fan, L. S., Leyva-Ramos, R., Wisecarver, K. D. & Zehner, B. J. Diffusion of phenol through a  
303 biofilm grown on activated carbon particles in a draft-tube three-phase fluidized-bed  
304 bioreactor. *Biotechnol. Bioeng.* **35**, 279-286 (1990).

305 27 Williamson, K. & McCarty, P. L. Verification Studies of the Biofilm Model for Bacterial  
306 Substrate Utilization. *J Water Pollut Control Fed.* **48**, 281-296 (1976).

307 28 Perry, R. & Perry, J. *Chemical Engineers' Handbook*. 4 edn, (McGraw-Hill, 1963).

308
